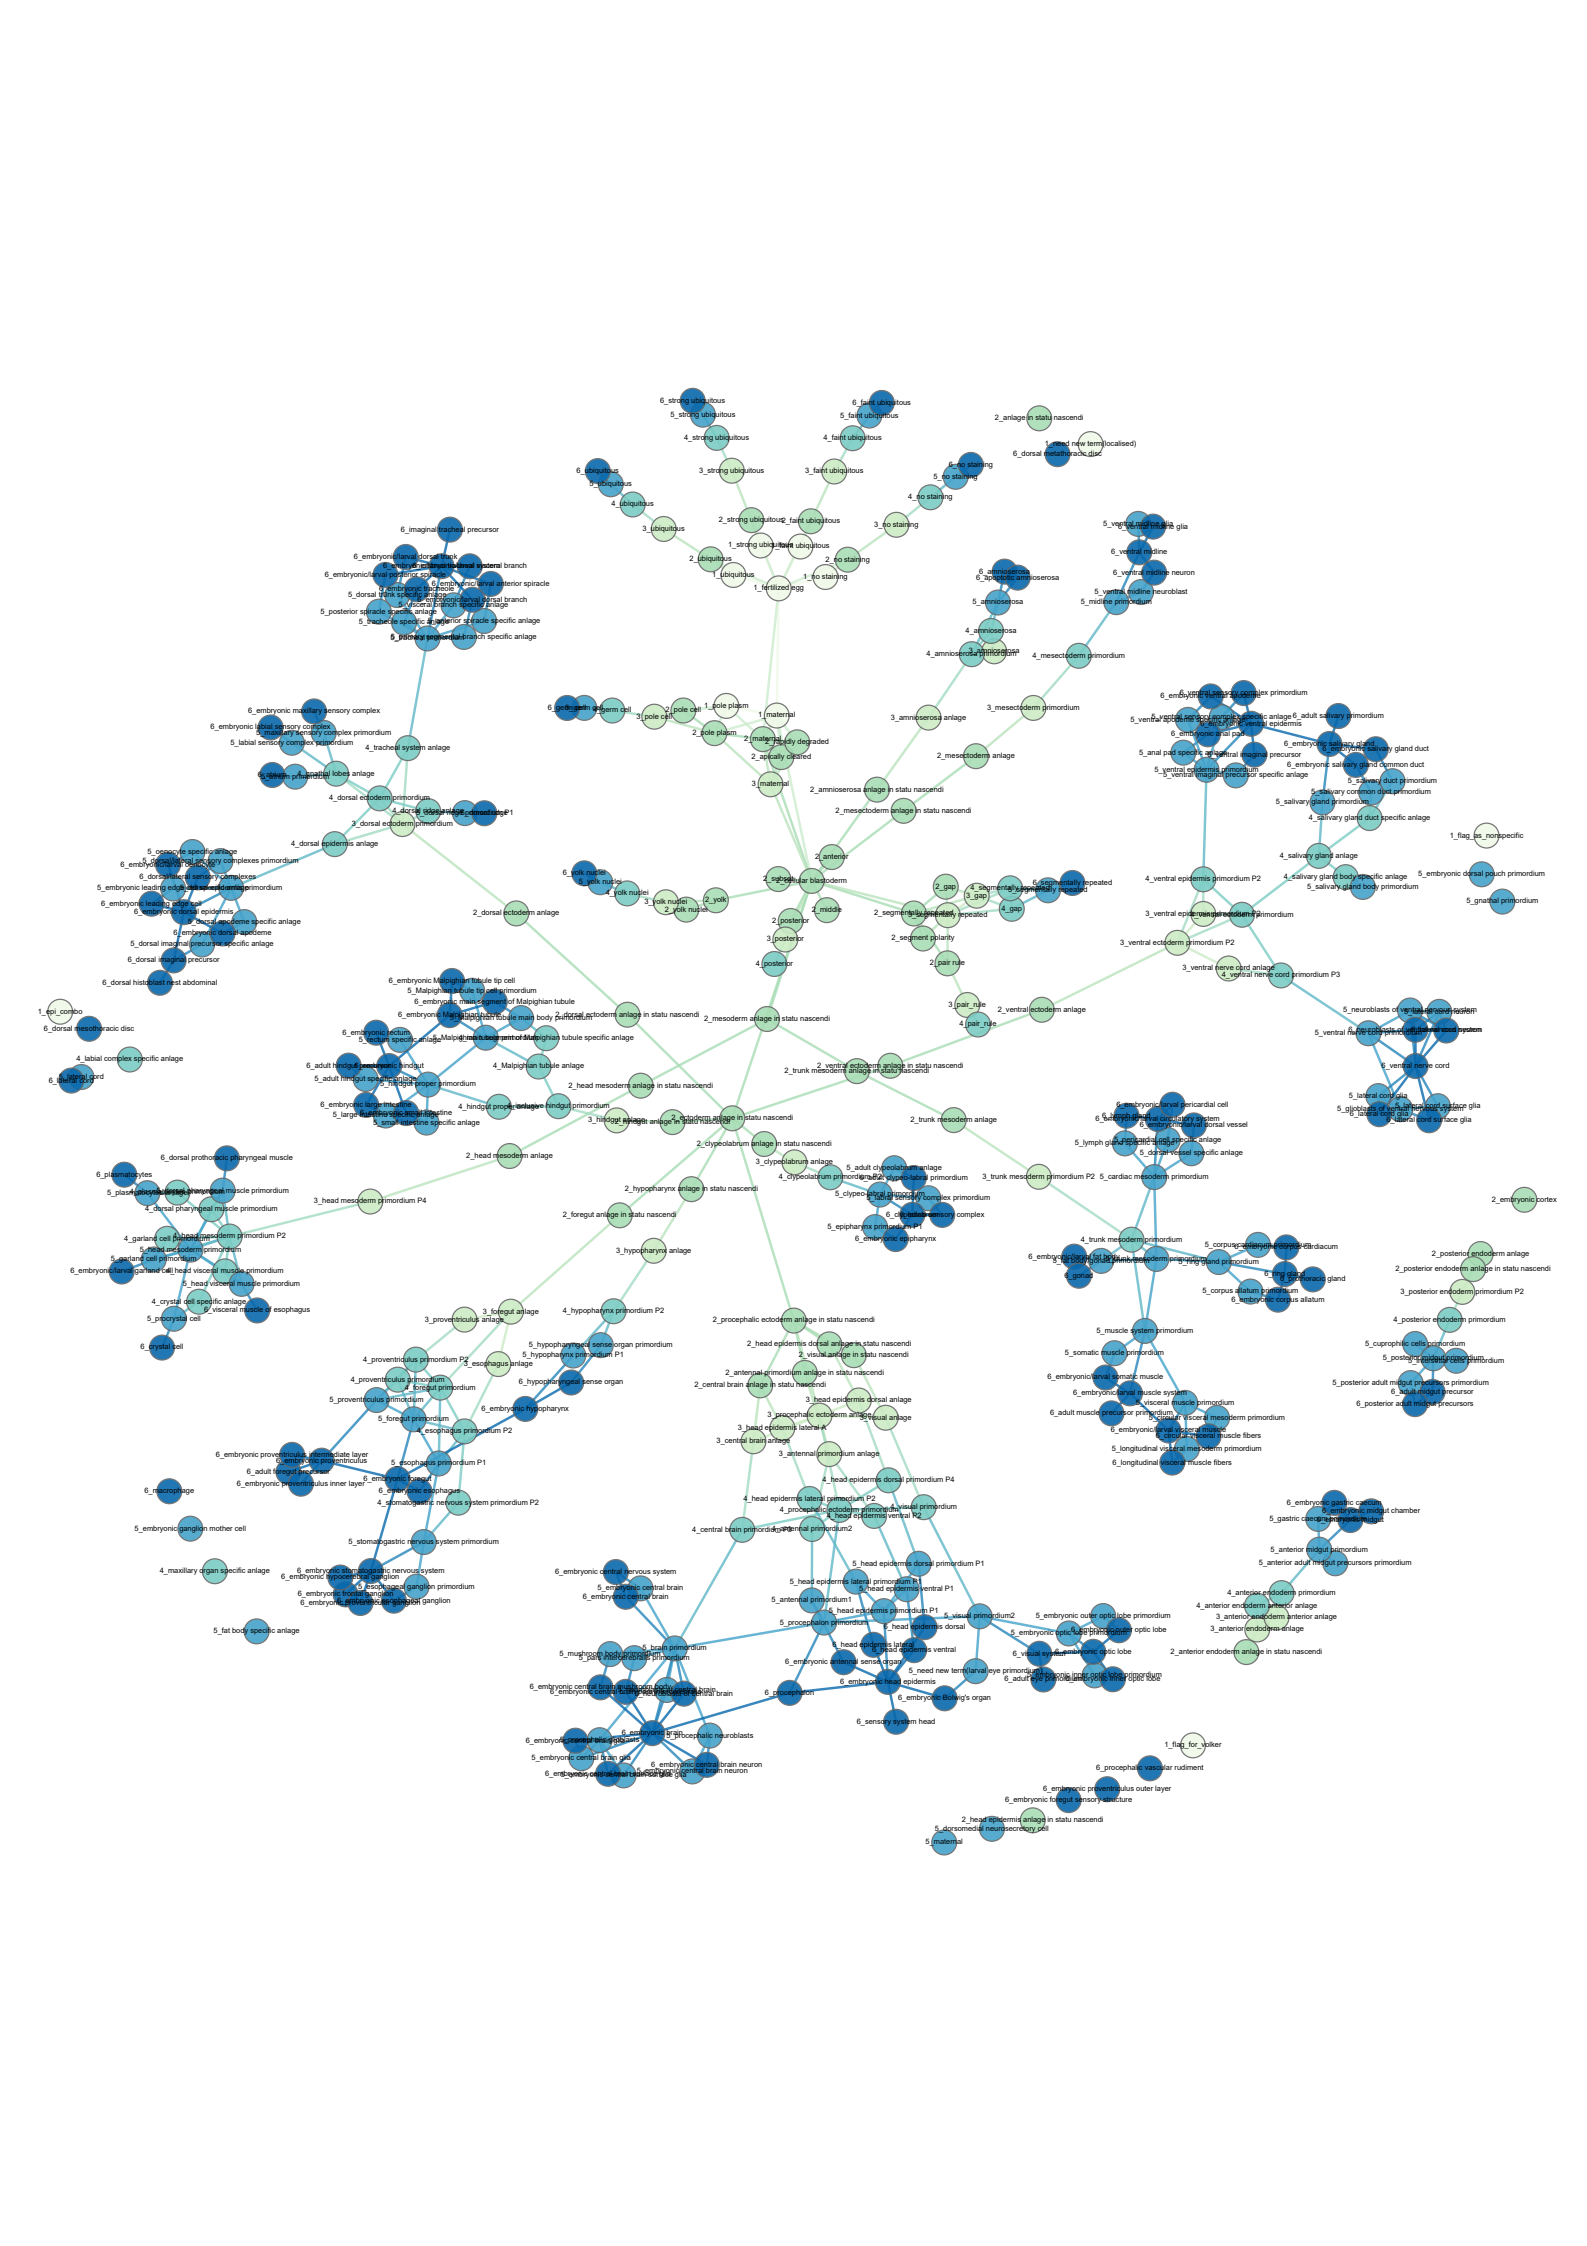

Source: https://storage.googleapis.com/plos-corpus-prod/10.1371/journal.pgen.1008382/2/pgen.1008382.s010.pdf?X-Goog-Algorithm=GOOG4-RSA-SHA256&X-Goog-Credential=wombat-sa%40plos-prod.iam.gserviceaccount.com%2F20210922%2Fauto%2Fstorage%2Fgoog4_request&X-Goog-Date=20210922T151854Z&X-Goog-Expires=86400&X-Goog-SignedHeaders=host&X-Goog-Signature=5b4a7ee8cc503f6a207226d9800d414715d841baf159c527b4fdfdd6de721cd9c198d52f62098079df7c6f2e487a86124d16daeb065c5ba7d8c844ff0122b3c221114face194773c78badf20811bb8636a1bca581966807e207e38e8b26b23352d720a888a49e3d24da2aacc08812fad3d27ed79d259f37c691ade22eaa4a922e088226ff512574e41dd40e2046b5f59b6bff9882ffe55cf7388bf91cbfb00c45e99174c70cceba929276173dea5794c20d6e46d54723d7b56016921e32497a3620053327eccb9771ed26d91d6065c7640e2f450ad69f8bd705ec7b9e7657c6c78716064b111d695e08864000256b6da2c6a64a3a7c15295d8d24665fafe46e7
